# Supplementary material for: Linear IgA Bullous Dermatosis in Korea Using the Nationwide Health Insurance Database
Source: MDPI journal article supplement (doi:10.3390/jcm13041159), 2024-02-19
Supplement: s1 [file s1]

Table S1. Frequency of antibiotic use concurrent with LABD biopsy

|                              | Before skin biopsy |                | Total    |
|------------------------------|--------------------|----------------|----------|
|                              | 31–60 days         | within 30 days |          |
| Vancomycin                   | 4                  | 6              | 10 (1.5) |
| Quinolones                   | 5                  | 6              | 11 (1.6) |
| 4th-generation cephalosporin | 2                  | 4              | 6 (0.9)  |
| 3rd-generation cephalosporin | 14                 | 26             | 40 (6.0) |
| 2nd-generation cephalosporin | 5                  | 7              | 12 (1.8) |
| 1st-generation cephalosporin | 13                 | 23             | 36 (5.4) |
| Penicillin                   | 0                  | 0              | 0 (0)    |
| Carboxypenicillin            | 0                  | 0              | 0 (0)    |
| Ureidopenicillins            | 9                  | 9              | 18 (2.7) |
| Aminopenicillins             | 3                  | 9              | 12 (1.8) |
| Monobactam                   | 0                  | 0              | 0 (0)    |
| Oxazolidinone                | 0                  | 0              | 0 (0)    |
| Anti-tuberculosis            | 0                  | 2              | 2 (0.3)  |
| Anti-malarial                | 1                  | 0              | 1 (0.1)  |
| Carbapenem                   | 4                  | 7              | 11 (1.6) |
| Non-vancomycin glycopeptides | 1                  | 2              | 3 (0.4)  |
| Cyclines                     | 1                  | 4              | 5 (0.7)  |
| Antifolate                   | 1                  | 4              | 5 (0.7)  |
| Dapsone                      | 1                  | 30             | 31 (4.6) |
| Polymixin                    | 0                  | 0              | 0 (0)    |
| Aminoglycoside               | 1                  | 4              | 5 (0.7)  |
| Nitroimidazole derivatives   | 0                  | 0              | 0 (0)    |
| Fusidate                     | 0                  | 0              | 0 (0)    |
| Macrolide                    | 4                  | 7              | 11 (1.6) |
| Lincosamides                 | 1                  | 1              | 2 (0.3)  |
| Fosfomycin                   | 0                  | 0              | 0 (0)    |
| Peptidyl transferase         | 0                  | 0              | 0 (0)    |
